# Supplementary material
Source: PubMed Central journal article supplement (PMC2726651)
Supplement: NIHMS86032-supplement-Supplementary_Figure_Legends.pdf [file NIHMS86032-supplement-Supplementary_Figure_Legends.pdf]

**Supplementary figure legends.**

**Supplementary Figure 1:** Quantification of Western blots from Figure 3: **A:** Figure 3A. **B:** Figure 3B. **C:** Figure 3C. **D:** Figure 3D. **E:** Figure 3E.

**Supplementary Figure 2:** Quantification of Western blots from Figures 4-5: **A-D:** Figure 4B, activation of eIF2 $\alpha$  (**A**), PERK (**B**), GCN2 (**C**), PKR (**D**). **E:** Figure 4E, activation CHOP mRNA. **F:** Figure 5B, overexpression of eIF2 $\alpha$ S51D.
