# Supplementary material
Source: PubMed Central journal article supplement (PMC2726651)

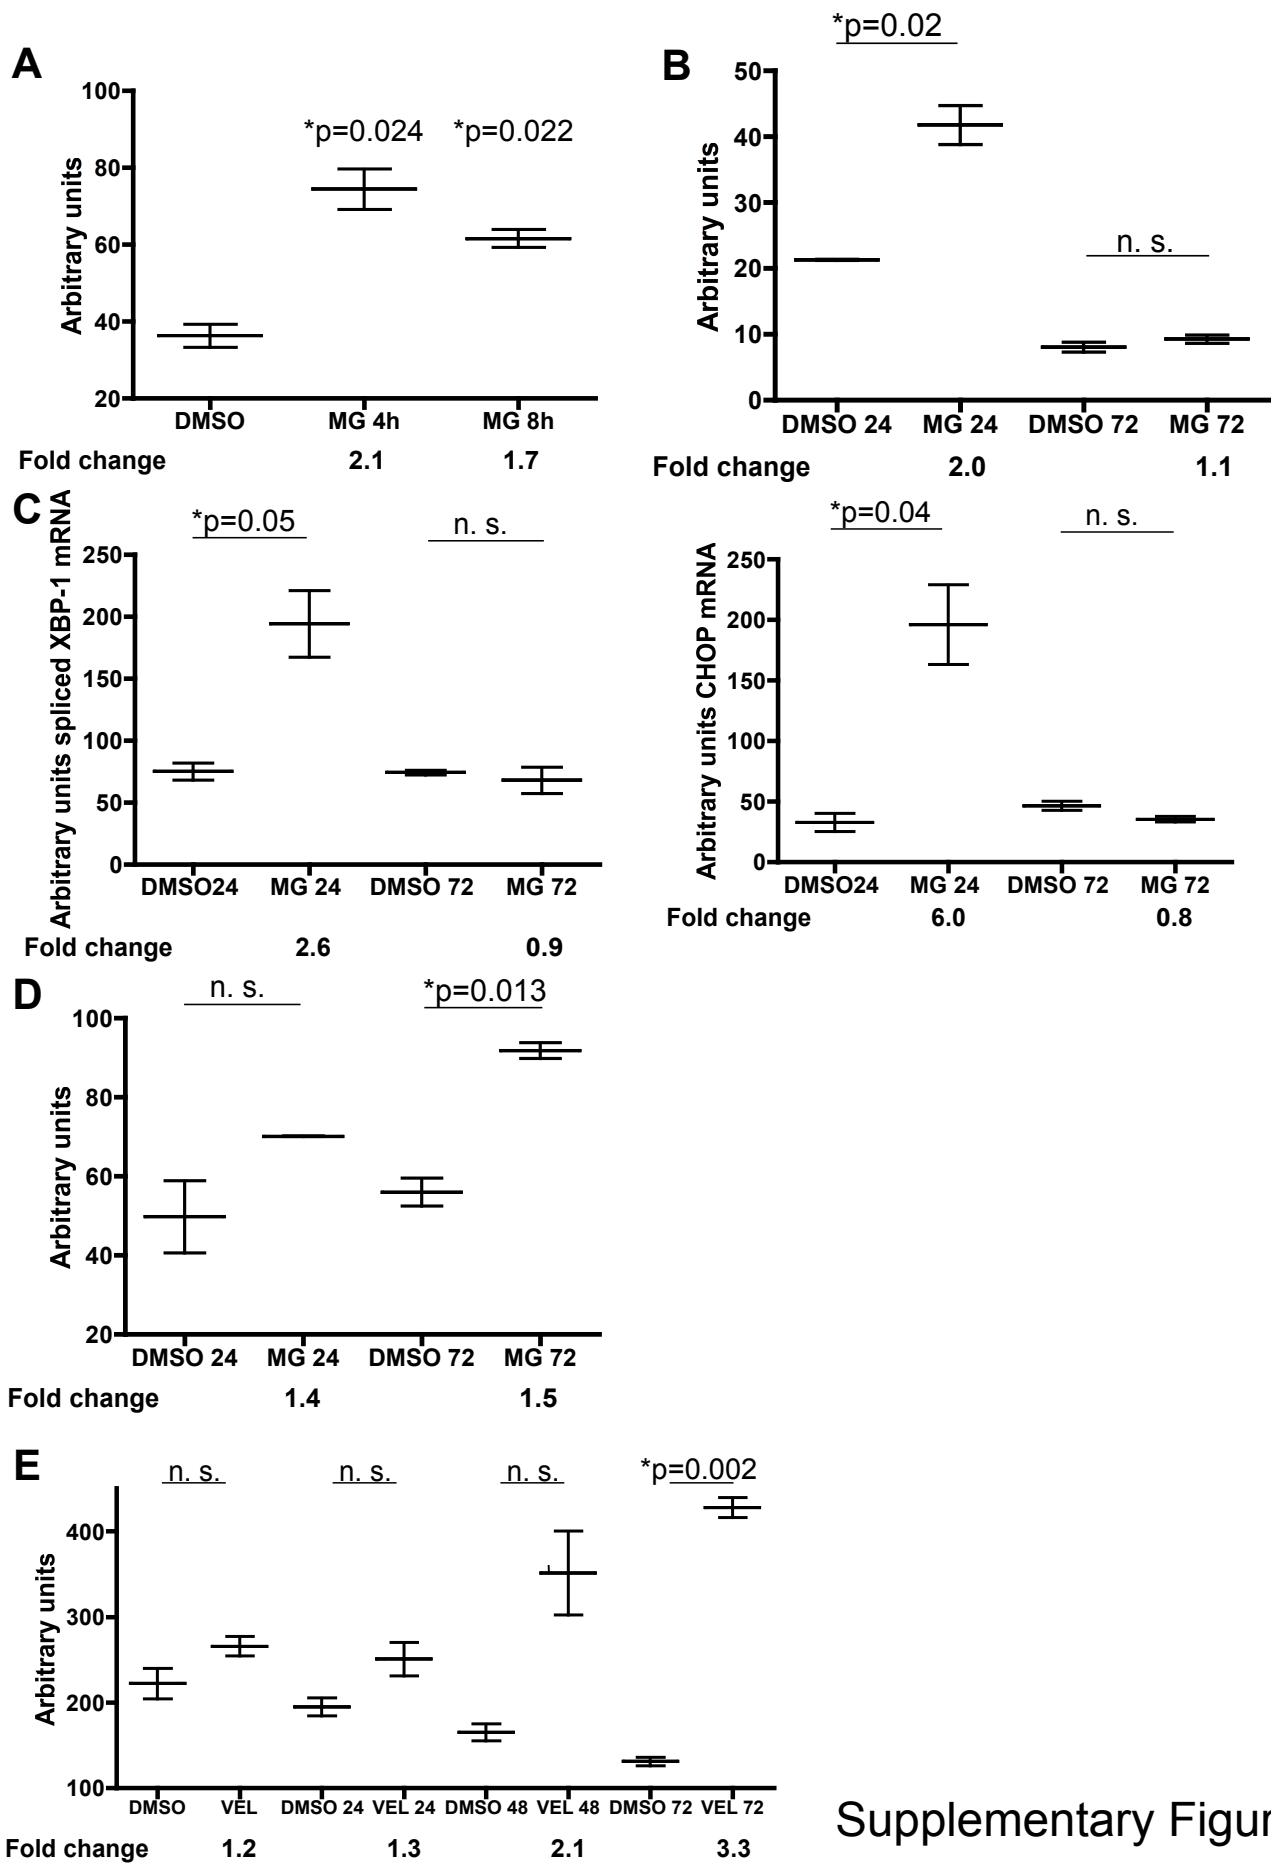

Supplementary Figure 1

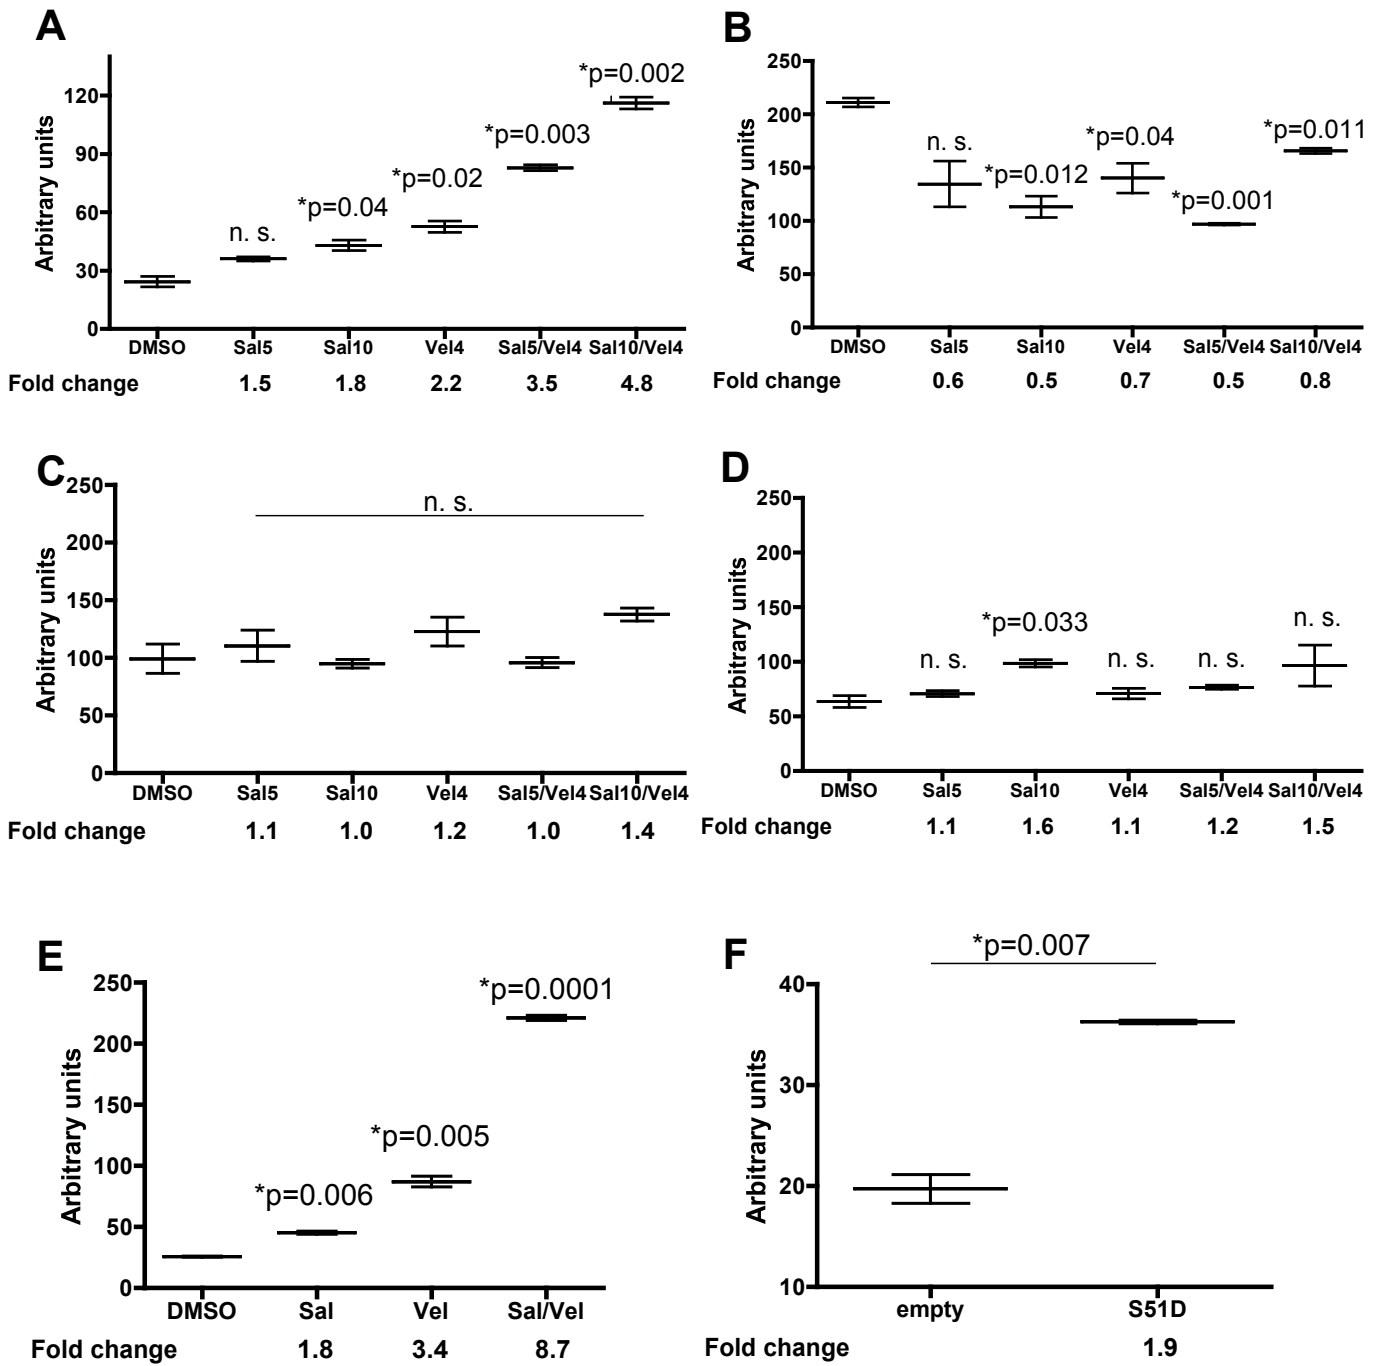

Supplementary Figure 2

Supplement: NIHMS86032-supplement-Supplementary_figures_1-2.pdf [file NIHMS86032-supplement-Supplementary_figures_1-2.pdf]
